# Supplementary material for: Early Levallois and the beginning of the Middle Paleolithic in central Italy
Source: PubMed Central journal article supplement (PMC5650164; doi:10.1371/journal.pone.0186082), 2017-10-20
Supplement: pone.0186082.s001.pdf [file pone.0186082.s001.pdf]

## Supporting Information

### Early Levallois and the beginning of the Middle Paleolithic in Central Italy

Sylvain Soriano\*, Paola Villa

\*To whom correspondence should be addressed. E-mail: sylvain.soriano@cnr.fr

#### S1 File. Figures and tables.

This PDF file includes:

S Figures A-B: Human remains from Sedia del Diavolo

S Tables A-B: Taphonomy of lithic industry

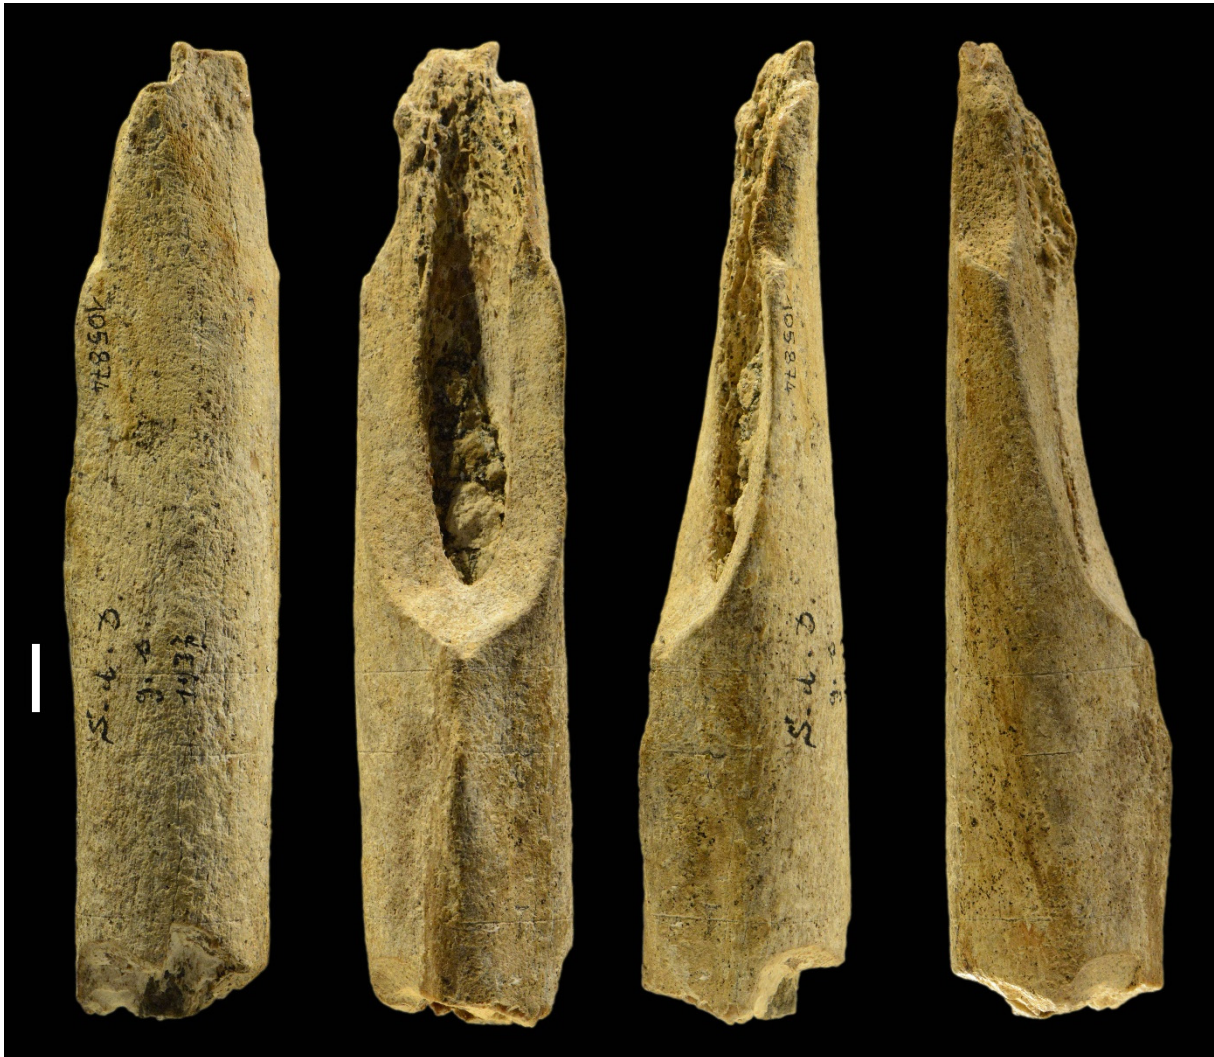

**S Figure A. Sedia del Diavolo. Right femoral diaphysis [1].** Scale bar=1cm. Photo Naccari / Pigorini Museum, courtesy of L. Bondioli.

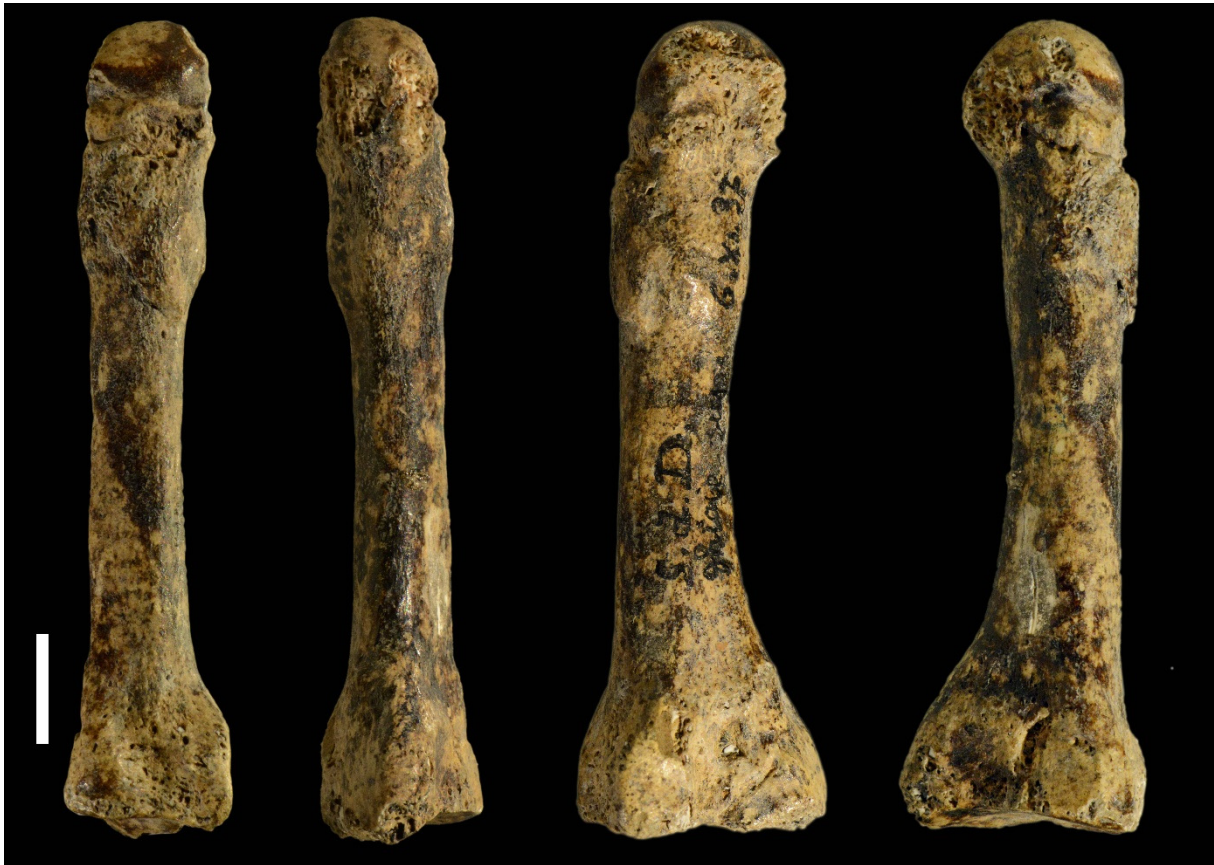

**Figure B. Sedia del Diavolo. Metatarsal [1].** Scale bar=1cm. Photo Naccari / Pigorini Museum, courtesy of L. Bondioli.

**Table A. State of preservation of artifacts from Sedia del Diavolo and Monte delle Gioie (indetermined cases excluded).**

|          | Fresh | Fluvial polish | Abraded | Very abraded | Total |
|----------|-------|----------------|---------|--------------|-------|
| <b>N</b> | 90    | 16             | 12      | 2            | 120   |
| <b>%</b> | 75.0  | 13.3           | 10.0    | 1.7          | 100   |

**Table B. Mean length, width and thickness of lithic pieces (all types included) from Sedia del Diavolo and Monte delle Gioie.**

|                   | Mean Length (mm) | Mean Width (mm) | Mean Thickness (mm) |
|-------------------|------------------|-----------------|---------------------|
| Sedia del Diavolo | 32.9             | 26.4            | 10.9                |
| Monte delle Gioie | 36.2             | 25.7            | 11.3                |
| Total             | 35.5             | 25.9            | 11.2                |

## References

1. Mallegni F. Les restes humains du gisement de Sedia del Diavolo (Rome) au Riss final. *L'Anthropologie*. 1986;90: 539–553.
